## 1 **Considerations for Developing and Implementing an Online Community-Based Exercise** 2 **Intervention for Adults Living with HIV: a qualitative study**

3  
4 Bernice Lau<sup>1</sup>, Isha Sharma<sup>1</sup>, Sukhbir Manku<sup>1</sup>, Julia Kobylanski<sup>1</sup>, Li Yin Wong<sup>1</sup>,  
5 Francisco Ibáñez-Carrasco<sup>2</sup>, Soo Chan Carusone<sup>3,4</sup>, Kelly K. O'Brien<sup>1,5,6</sup> §

6  
7 <sup>1</sup> Department of Physical Therapy, Temerty Faculty of Medicine, University of Toronto,  
8 Toronto, Ontario, Canada

9 <sup>2</sup> Dalla Lana School of Public Health, University of Toronto, Toronto, Ontario, Canada

10 <sup>3</sup> Casey House, Toronto, Ontario, Canada

11 <sup>4</sup> McMaster Collaborative for Health and Aging, McMaster University, Hamilton, Ontario,  
12 Canada

13 <sup>5</sup> Rehabilitation Sciences Institute (RSI), University of Toronto, Toronto, Ontario, Canada

14 <sup>6</sup> Institute of Health Policy, Management and Evaluation (IHPME), Dalla Lana School of  
15 Public Health, University of Toronto, Toronto, Ontario, Canada

16  
17 § Corresponding author: Kelly K. O'Brien, PhD, BScPT  
18 ORCID: 0000-0002-1632-6537

19  
20 Department of Physical Therapy  
21 University of Toronto  
22 160-500 University Avenue  
23 Toronto, Ontario M5G 1V7  
24 Canada  
25 Phone: 1-416-978-0565  
26 Email: [kelly.obrien@utoronto.ca](mailto:kelly.obrien@utoronto.ca)

### 27 28 **E-mail addresses of authors:**

29 Bernice Lau (BL) MScPT(c): [ber.lau@mail.utoronto.ca](mailto:ber.lau@mail.utoronto.ca)

30 Isha Sharma (IS) MScPT(c): [is.sharma@mail.utoronto.ca](mailto:is.sharma@mail.utoronto.ca)

31 Sukhbir Manku (SM) MScPT(c): [sukhbir.manku@mail.utoronto.ca](mailto:sukhbir.manku@mail.utoronto.ca)

32 Julia Kobylanski (JK) MScPT(c): [j.kobylanski@mail.utoronto.ca](mailto:j.kobylanski@mail.utoronto.ca)

33 Li Yin Wong (LYW) MScPT(c): [liyin.wong@mail.utoronto.ca](mailto:liyin.wong@mail.utoronto.ca)

34 Francisco Ibáñez-Carrasco (FIC) PhD: [francisco.ibanez.carrasco@utoronto.ca](mailto:francisco.ibanez.carrasco@utoronto.ca)

35 Soo Chan Carusone (SCC) PhD: [schancarusone@caseyhouse.ca](mailto:schancarusone@caseyhouse.ca)

36 Kelly K. O'Brien (KKO) PhD: [kelly.obrien@utoronto.ca](mailto:kelly.obrien@utoronto.ca)

37  
38  
39 **Word Count:** 4944

41 **Considerations for Developing and Implementing an Online Community-Based Exercise**  
42 **Intervention with Adults Living with HIV: a qualitative study**

43  
44 **ABSTRACT**

45 **Objectives:** To describe the need for and utility of online community-based exercise (CBE)  
46 interventions with adults living with HIV and identify factors to consider in developing and  
47 implementing an online CBE intervention with adults living with HIV.

48 **Design:** Qualitative descriptive study using web-based semi-structured interviews.

49 **Participants:** We recruited adults representing at least one of five stakeholder groups with experience  
50 in CBE and/or HIV: 1) adults living with HIV, 2) rehabilitation professionals, 3) fitness personnel, 4)  
51 educators with eLearning experience, and 5) representatives from HIV community-based organizations  
52 (CBOs).

53 **Data Collection:** We asked participants to describe their experiences with online CBE, need and utility  
54 for online CBE, and factors in developing and implementing online CBE interventions. We analyzed  
55 data using group-based content analytical techniques.

56 **Results:** Among the 11 participants, most had experience working with adults living with HIV (73%)  
57 or with tele-health/rehabilitation/coaching in HIV or other chronic conditions (91%). Participants  
58 identified the need and utility for online CBE interventions to increase accessibility and continuity of  
59 care with adults living with HIV. Six factors to consider in developing and implementing online CBE  
60 included: 1)person-specific considerations (episodic nature of HIV, stigma, HIV disclosure),  
61 2)accessibility of program (physical space to exercise, reliable internet, access to devices, digital  
62 literacy), 3)program delivery and technology (live versus pre-recorded online classes, multiple online  
63 platforms for delivery, physical activity tracking, troubleshooting technology), 4)attributes of program  
64 personnel (working with CBOs, relatable instructors, diverse staff), 5)program content and design  
65 (tailored exercise classes, educational sessions) and 6)building community (shared experiences, peer  
66 support, social opportunities).

67 **Conclusions:** There is a need and utility for online CBE in the context of HIV. Considerations for  
68 development and implementation span individual, structural and technical, and community dimensions.  
69 Results can inform the future development and implementation of online CBE with adults living with  
70 HIV and other chronic episodic conditions.

72 **KEY WORDS:** HIV, exercise, online, web-based, community-based exercise, qualitative

73

74 **STRENGTHS & LIMITATIONS OF THIS STUDY**

- 75 ● To our knowledge, this is the first qualitative study exploring the perspectives of key  
76 stakeholders in developing and implementing an online community-based exercise (CBE)  
77 program for adults living with HIV.
- 78 ● Insights gained from this study can help to inform future online community-based exercise  
79 programming for adults living with HIV and other chronic and episodic conditions.
- 80 ● We used the Model for ASsessment of Telemedicine applications (MAST) framework as a  
81 conceptual foundation to design the interview guide, which enabled us to comprehensively  
82 explore diverse aspects of telemedicine services in relation to information, communication and  
83 technology.
- 84 ● All interviews were conducted online with participants who had access to technological devices  
85 and reliable internet, therefore, results may not be transferable to individuals or contexts  
86 without access to technology.
- 87 ● Most participants were living in Canada, hence, it is unclear how results may be transferable to  
88 other geographical contexts.

89

90

91

## 92 INTRODUCTION

93 The advent of antiretroviral therapy (ART) has increased the longevity of people living with HIV  
94 (PLWH).<sup>1</sup> Nevertheless, the combination of HIV, side-effects of ART, aging, and multimorbidity in  
95 PLWH can contribute to multiple complex and episodic physical, cognitive, mental, emotional, and  
96 social health challenges, which can be conceptualized as disability.<sup>2-4</sup> These challenges, such as pain,  
97 fatigue, reduced day-to-day activities, anxiety, depression, social exclusion, financial insecurity, and  
98 uncertainty regarding future health are associated with disability, poorer adherence to ART, and  
99 complexity of health management.<sup>5-7</sup> Despite these multilevel health challenges, PLWH have  
100 demonstrated a capacity for resilience and advocacy from within their community, and readiness to  
101 engage in behaviours to improve health outcomes, such as exercise.<sup>8-11</sup>

102 Aerobic and resistive exercise, particularly a combination, is an effective rehabilitation strategy  
103 that can reduce disability and improve health outcomes among PLWH.<sup>12-15</sup> However, despite the  
104 benefits, results from a systematic review indicated 51% of PLWH met the recommended 150 minutes  
105 of moderate-vigorous aerobic physical activity per week.<sup>16</sup> Potential barriers to exercise may include  
106 stigma, discomfort with exercise environments, lower socioeconomic status, transportation  
107 accessibility, physical symptoms, and the episodic nature of HIV, highlighting the need to consider  
108 different models of exercise implementation for PLWH.<sup>17-19</sup> Community-based exercise (CBE)  
109 includes an individual, or a group of individuals with related conditions, engaging in an organized set  
110 of exercises under the supervision of a healthcare practitioner or exercise specialist, such as a physical  
111 therapist or a fitness instructor in a community-based facility.<sup>20 21</sup> CBE has been well established and  
112 researched in other populations of individuals living with chronic conditions.<sup>22-25</sup> CBE can cultivate  
113 social interaction, encourage regular exercise and facilitate self-management strategies in PLWH to  
114 independently manage health challenges.<sup>26-29</sup> Additionally, CBE can provide physical health benefits in  
115 PLWH such as a decrease in lipid profile, waist circumference, diastolic and systolic blood pressure,

116 and an increase in upper and lower body muscular strength.<sup>28 30 31</sup> Despite the benefits of CBE, PLWH  
117 may experience barriers to exercising in traditional gym environments, including, interpersonal,  
118 financial, and geographical barriers, self-image issues and stigma, and difficulty initiating exercise  
119 following periods of inactivity.<sup>26 29</sup> Furthermore, events of the COVID-19 pandemic such as gym  
120 closures has highlighted the need to consider novel ways in which to facilitate engagement in CBE  
121 among PLWH.<sup>32</sup>

122         Tele-rehabilitation is the delivery of rehabilitation programs or services via technology, such as  
123 phone and video calls, web-based platforms, or mobile apps; used initially to increase efficiency,  
124 quality of care, and access to healthcare for populations with geographical barriers.<sup>33 34</sup> This method of  
125 delivery has become essential for delivering care in the context of the COVID-19 pandemic with the  
126 closure of many in-person services.<sup>35 36</sup> Tele-rehabilitation can mitigate transportation, financial, and  
127 time commitment barriers to CBE, with the potential to improve access to exercise programs for  
128 PLWH.<sup>37</sup> Tele-coaching, a component of tele-rehabilitation that involves the use of technology for  
129 remote supervision, guidance, and communication of an exercise program, can help to improve  
130 physical activity levels and manage symptoms for people living with chronic diseases.<sup>38-40</sup> Hence, tele-  
131 coaching may be an ideal model to enhance engagement in CBE for PLWH.<sup>41-43</sup> However, the  
132 translation of online tele-coaching CBE programs within an HIV context, and the specific  
133 considerations and recommendations for developing and implementing an online CBE program with  
134 PLWH is unknown. Our aim was to describe considerations for developing and implementing an online  
135 CBE intervention with adults living with HIV, from the perspectives of stakeholders with a role in  
136 online CBE implementation with adults living with HIV including: persons living with HIV,  
137 rehabilitation or other healthcare professionals, fitness professionals, eLearning educators, and  
138 representatives from HIV community-based organizations (CBOs). Specific objectives were: 1) to  
139 describe the need for, and utility of, online CBE interventions with adults living with HIV and 2) to

140 identify factors to consider in developing and implementing an online CBE intervention with adults  
141 living with HIV.

## 142 **METHODS**

### 143 **Study Design**

144 We conducted a cross-sectional qualitative descriptive study using web-based semi-structured  
145 interviews with multiple stakeholders to explore perspectives of online CBE and the HIV community.<sup>44</sup>  
146 This study was approved by the University of Toronto Research Ethics Board (Protocol #39603).

### 147 **Patient and public involvement**

148 We consulted with two community members living with HIV with expertise in HIV and exercise for  
149 guidance throughout the study. Community members participated in pilot interviews and advised on the  
150 development of and provided feedback on the interview guide and process. This research evolved from  
151 a long-standing community-academic-clinical partnership among people ageing with HIV, researchers,  
152 and clinicians who identified key research priorities in HIV, ageing and rehabilitation as part of the  
153 Canada-International HIV and Rehabilitation Research Collaborative (CIHRRC).<sup>45</sup> Results from this  
154 study will be translated via a study summary emailed to study participants and presentations at  
155 conferences and community organizations.

### 156 **Participants**

157 We recruited ‘online CBE stakeholders’ defined as having a role in online CBE implementation with  
158 adults living with HIV, specifically possessing experience, expertise, or interest in areas including any  
159 combination of HIV, tele-coaching (exercise), tele-rehabilitation, or eLearning. We recruited adults (18  
160 years of age or older) who self-identified as representing at least one of five stakeholder groups: 1)  
161 persons living with HIV, with experience or interest in online exercise applications or interventions  
162 (PLWH); 2) rehabilitation professionals or other health care professionals with a role in rehabilitation

163 with people living with chronic disease and experience in tele-health or tele-rehabilitation interventions  
164 (RP); 3) fitness personnel or managers engaged in online exercise personal instruction or online  
165 exercise class delivery (for-profit and non-profit sectors) (FP); 4) educators with experience in  
166 eLearning in the field of rehabilitation or chronic disease management (eL); and/or 5) representatives  
167 from community-based organizations (CBOs) with experience delivering health or social support  
168 services remotely with PLWH (CBO).

## 169 **Recruitment**

170 We purposively identified individuals in the community who possessed experience in at least one of the  
171 five stakeholder groups. Members of the team (BL, IS, SM, JK, LYW) sent an email to stakeholders to  
172 introduce themselves as MScPT students and to explore interest and eligibility to participate in the  
173 study. Stakeholders who responded with interest were scheduled for an interview. We obtained written  
174 or verbal consent from all participants prior to participation in the study.

## 175 **Data Collection**

176 Two MScPT student team members (one interviewer and one field note taker) conducted interviews  
177 with each participant using web-based (Zoom) software.<sup>46 47</sup> Team members conducting the interviews  
178 did not have a prior relationship with participants.

179 Interview guide: We used a semi-structured interview guide tailored for each stakeholder group  
180 (Supplemental file 1). We developed the interview guide using the Model for ASsessment of  
181 Telemedicine applications (MAST) framework, used to inform the assessment of existing telemedicine  
182 applications.<sup>48</sup> Our interview guide included questions that pertain to each of the eight domains of the  
183 MAST framework: health; clinical impact; characteristics of the application; safety; person-specific  
184 and environmental-factors; sociocultural, ethical, and legal factors; economic factors and organizational  
185 factors.<sup>48</sup> Based on feedback from two pilot interviews with PLWH and eLearning stakeholders, we

186 developed a PowerPoint slideshow to accompany the interview questions that we shared on screen via  
187 Zoom during the interview to facilitate understanding in subsequent interviews (Supplemental file 2).  
188 We refined the interview guide twice throughout our study to clarify the probing questions and  
189 terminology.

190 Interviews: At the start of each interview, we asked five demographic questions pertaining to age,  
191 gender, stakeholder group(s), experiences working with PLWH, and experiences with tele-health/tele-  
192 rehabilitation/tele-coaching/exercise online with PLWH or other chronic conditions. We tailored our  
193 questions according to the stakeholder group each participant self-identified with during the interview.  
194 In the interviews, we asked participants about their perspectives on the need for and utility of online  
195 CBE programs with PLWH, the factors important for developing and implementing online CBE  
196 interventions with PLWH, followed by overall recommendations for developing and implementing an  
197 online CBE program in the context of HIV. We defined the ‘need’ for online CBE programming as  
198 filling or addressing a gap in health care and ‘utility’ as how this intervention could be useful with  
199 PLWH. Interviews were recorded on an audio recorder. Participants received a \$30 electronic gift card  
200 as a token of appreciation for their participation in the study. All interviews were audio recorded using  
201 a digital recorder and later transcribed verbatim.

## 202 **Data Analysis**

203 Interview Data: We performed data collection and analysis simultaneously. We reviewed the  
204 transcripts for accuracy. We used a combination of Braun and Clarke’s thematic analysis procedure  
205 with the DEPICT group-based approach to inform our data analysis.<sup>49 50</sup> Our group-based analytical  
206 approach consisted of six steps: 1) dynamic reading (all students [BL, IS, SM, JK, LYW] and at least  
207 one advisor [FIC, SCC, KKO] reviewed the first five transcripts to note first impressions of the data  
208 and create initial codes relating to the study objectives), 2) codebook development (students met as a  
209 group to discuss agreed upon codes and establish a common technique for coding future transcripts and



210 generation of a codebook), 3) coding remaining transcripts (the remaining six transcripts were divided  
211 equally among three students [IS, SM, LYW] and coded independently) 4) inclusive reviewing and  
212 summarizing of categories (codes were organized into categories and summaries developed for each  
213 category), 5) collaborative analyzing (students met as a group to make sense of data and create a figure  
214 to illustrate findings), 6) translating (students and advisors met throughout to refine the results for  
215 knowledge translation). We used NVivo software to facilitate data management (QSR International,  
216 NVivo, V.12)<sup>51</sup> and developed participant summaries that included demographic information.

217 Demographic Data: We calculated medians and 25-75<sup>th</sup> percentiles for continuous variables (age) and  
218 frequency (%) for categorical variables (gender; stakeholder group; experiences working with PLWH;  
219 delivering online CBE).

## 220 **Sample Size**

221 We used a combination of purposive and snowball sampling, with the aim of recruiting a sample of 12  
222 to 15 participants, with  $\geq 2$  participants from each of the five stakeholder groups.<sup>52</sup> Previous studies  
223 using qualitative descriptive methods to explore (in-person) CBE for PLWH used a similar sample size,  
224 with three stakeholder groups from which they were able to recruit a minimum of two participants  
225 each.<sup>27</sup> Based on previous studies, we did not anticipate this proposed sample size to reach saturation.  
226 However, this was not the goal of our study as our aim was to recruit a sample that enabled us to  
227 capture a diversity of perspectives and experiences in the context of online CBE interventions, allowing  
228 us to adequately address study objectives.

## 229 **RESULTS**

230 Of the 24 CBE stakeholders approached, 11 participated in an interview between January and May  
231 2021, lasting between 60-90 minutes in duration. The median age of the participants was 49 years (25-  
232 75<sup>th</sup> percentile: 40, 58); and the majority (73%) identified as women and lived in Canada (91%). The

233 majority were rehabilitation professionals (63%). Eight (73%) participants had prior experience  
234 working with PLWH and almost all participants (91%) had experience with tele-health, tele-  
235 rehabilitation, tele-coaching, or online exercise for PLWH or other chronic conditions (Table 1). Of the  
236 11 participants, 10 (91%) represented two or more stakeholder groups.

237 **Table 1 – Characteristics of Participants (n=11)**

| <b>Demographic Characteristics</b>                                                                                                                   | <b>Number of Participants (%)</b> |
|------------------------------------------------------------------------------------------------------------------------------------------------------|-----------------------------------|
| <b>Gender</b>                                                                                                                                        |                                   |
| Woman                                                                                                                                                | 8 (73%)                           |
| Man                                                                                                                                                  | 2 (18%)                           |
| Non-Binary                                                                                                                                           | 1 (9%)                            |
| <b>Community-Based Exercise Stakeholder Group*</b>                                                                                                   |                                   |
| People Living with HIV (PLWH)                                                                                                                        | 4 (36%)                           |
| Rehabilitation Professional (RP)                                                                                                                     | 7 (63%)                           |
| Fitness Professional (FP)                                                                                                                            | 4 (36%)                           |
| Educator with experience in ELearning (eL)                                                                                                           | 6 (55%)                           |
| Representative from HIV Community-Based Organization (CBO)                                                                                           | 3 (27%)                           |
| <b>Experiences working with People Living with HIV</b>                                                                                               | 8 (73%)                           |
| <b>Experiences with tele-health / tele-rehabilitation / tele-coaching or online exercise with People Living with HIV or other chronic conditions</b> | 10 (91%)                          |

238 \*Percentages may not add up to 100% as some participants self-identified as representing more than  
239 one stakeholder group. CBE: community-based exercise. PLWH: persons living with HIV, with  
240 experience or interest in online exercise applications or interventions. RP: rehabilitation professionals  
241 or other health care professionals with a role in the rehabilitation of people living with chronic disease  
242 with experience in tele-health or tele-rehabilitation interventions. FP: fitness personnel or managers  
243 engaged in online exercise personal instruction or online exercise class delivery (for-profit and non-  
244 profit sectors). eL: educators with experience in eLearning in the field of rehabilitation or chronic  
245 disease management. CBO: representatives from community-based organizations with experience  
246 delivering health or social support services remotely to adults living with HIV.

247

248

## 249 **Need and utility for online CBE interventions in the context of HIV**

250 Participants described the “need” for online CBE and its “utility” as interconnected. These categories  
251 represent the need for access to health services by PLWH, especially those aging, who may experience  
252 difficulties with self-image, feeling stigmatized (perceived stigma), mobility issues and incidental costs  
253 such as membership fees and transportation.

254 The *need* for online CBE was reported as amplified during the COVID-19 pandemic. Most participants  
255 confirmed that online CBE was necessary, beneficial and diversifies options for access by PLWH. This  
256 increase in accessibility was described as geographical independence. Not having to travel to attend  
257 gym environments to exercise increased the overall accessibility of CBE for populations who may live  
258 in more remote areas:

259 *“You might not have a role model fitness instructor that's specialized in HIV. But by moving*  
260 *services online you've got a much bigger reach to deliver care and to allow people to connect*  
261 *with others.”* (P04; RP, FP, eL stakeholder).

262 The *utility* of online CBE to address gaps in accessibility to health services was described as the ability  
263 to enhance continuity of care and improve multidimensional health outcomes for people living with  
264 HIV. One participant with experience delivering CBE for stroke survivors spoke about the potential for  
265 online CBE to provide on-going healthcare management; to:

266 *“[expand] the window of opportunity for rehab”* both between healthcare appointments or after  
267 leaving a particular setting or program as *“they [end-users] may continue on an outpatient basis*  
268 *for a couple of months, [and] can now be at home and still have access to a therapist, two days*  
269 *a week through our tele-rehab program.”* (P01; RP, eL stakeholder).

270 Notably, participants suggested online CBE may be used to support physical and mental health  
271 dimensions of PLWH, used as *“their primary form of exercise”* or have *“specific health needs that they*

272 *have anxiety around or that may need support with.*” This utility of online CBE was a “*tool in the*  
273 *toolbox*” to support healthy aging in this population. A participant involved in online CBE program  
274 delivery for different populations mentioned: “*Just keeping people in good physical and emotional*  
275 *health helps healthy aging.*” (P04; RP, FP, eL stakeholder).

## 276 **Factors in developing and implementing an online CBE intervention with adults living with HIV**

277 We identified six factors to consider in developing and implementing online CBE for PLWH, all of  
278 which were interconnected across individual, structural and community dimensions (Figure 1).

279 *Insert Figure 1 here*

280 At the center was the individual dimension, referring to person-specific considerations with adults  
281 living with HIV, which were integral and at the forefront when creating person-centered online CBE  
282 programming. Surrounding the individual dimension was the structural dimension, defined as the  
283 logistical and technical considerations providing the groundwork for online CBE, and include  
284 accessibility of program, program delivery and technology, attributes of program personnel, and  
285 program content and design. The individual and structural dimensions were interconnected with the  
286 community dimension, consisting of opportunities for building community with online CBE.

287

### 288 Individual Dimension

#### 289 *Person-Specific considerations with adults living with HIV*

290 Participants mentioned the importance of understanding the complexities of living with HIV as they  
291 relate to in-person and online CBE, including challenges with the episodic nature of the disease,  
292 stigma, and HIV status disclosure:

293 *“HIV is an episodic disability...the clients I see are generally quite complex, they have multiple*  
294 *comorbidities or multimorbidity...some people say, 80-90% of our clients have mental health*  
295 *issues and almost as high of percentage have substance use issues.” (P03; RP, FP, eL*  
296 *stakeholder).*

297 Participants also discussed the importance of understanding HIV-related stigma and the  
298 intersectionality of gender, sexual orientation, and body image, and how it affects access and  
299 willingness to exercise, including through an online platform:

300 *“I think that there is a lot of fear of being judged, by [...] fitness instructors, employees within*  
301 *the gym, other people at the gym. I think generally speaking from my experience, people living*  
302 *with HIV would rather have an HIV only exercise group. But that comes with a confidentiality*  
303 *breach, a potential one.” (P10; RP, FP, eL stakeholder)*

304 As such, when participating in online CBE specifically for PLWH, participants described concerns  
305 regarding confidentiality and fear of HIV disclosure when participating in online CBE programming:

306 *“you’d hate for someone to be outed as being HIV when they’re not out in the community, or to*  
307 *their friends or to their family.” (P02; PLWH stakeholder).*

308 These potential challenges and barriers should be considered when designing online CBE programs  
309 with adults living with HIV.

310

311 Structural Dimension

312 *Accessibility of Program*

313 Participants highlighted the importance of considering the extent of access by PLWH to online CBE  
314 programs including having the physical space to exercise, reliable internet, access to devices, such as  
315 computers, tablets, smartphones, and the digital literacy skills to use these devices:

316 *“The older population may not have Internet or may not know how to use the Internet. Then*  
317 *access to technology, you'd have to take the time to explain Zoom if that's the platform that*  
318 *you're going to be using for the program [...] So there's a lot of pre-exercise program*  
319 *technology that needs to be done with individuals.”* (P07; PLWH, eL, CBO stakeholder)

320 To make online CBE inclusive and accessible, participants suggested offering a modicum of training to  
321 PLWH to enhance their digital literacy as described by a participant involved with online CBE for  
322 stroke survivors:

323 *“We're using Zoom as the platform [...] what we're trying to do to help support people is that*  
324 *they have some, ‘virtual intake sessions’ so that we have some time in those sessions to actually*  
325 *talk them through: How do you navigate Zoom? We have a manual that we sent to them and*  
326 *they can install it on their device ahead of time, and we're there to troubleshoot.”* (P01; RP, eL  
327 stakeholder)

328

### 329 *Program Delivery and Technology*

330 All participants discussed CBE program delivery and its associated technology as an important factor,  
331 which included considerations for live versus pre-recorded online exercise classes, using multiple  
332 online platforms for delivery, physical activity tracking, and troubleshooting technology. Participants  
333 noted the importance of using synchronous and asynchronous modalities to deliver online CBE such as  
334 pre-recorded classes, which were advantageous for those *“who want to exercise in their own time or*

335 *those who cannot join them live*", meanwhile live classes would allow for instructor real-time  
336 correction and guidance as well as interaction among end-users.

337 Participants noted the importance of knowing how to use multiple platforms, such as Zoom and  
338 Microsoft Teams, to meet the needs of end-users. Notably, Zoom was the most mentioned platform  
339 used by participants. While some participants expressed concerns regarding privacy and usage of  
340 tracking data, options to track physical activity were described by others to be potentially beneficial to  
341 the end-user:

342 *“Data tracking for motivation and monitoring is really important ‘cause then you could see*  
343 *how much you’re progressing or where you have to work on something a little bit more.”* (P06;  
344 PLWH, CBO stakeholder).

345 Participants highlighted some challenges created by the implementation of online CBE, specifically  
346 referring to troubleshooting technology related to audio/visual components, internet reliability, and  
347 devices used for online delivery of CBE programs:

348 *We need a strong Wi-Fi, and we need a nice mic - nicely set, then we can deliver the voice, the*  
349 *music at once. So, if one of those [things has] small hiccups, the experience is not going to the*  
350 *members.* (P05; RP, FP stakeholder)

351

### 352 *Attributes of Program Personnel*

353 Participants involved in previous online CBE programming reported the importance of having relatable  
354 and diverse staff who are able to liaise and work with community-based organizations, especially HIV  
355 community based organizations (CBOs). One participant with experience using online CBE suggested:  
356 *“some of the best resources are probably your local AIDS service organizations”*. Having a relatable  
357 instructor also was discussed as an important factor by many participants, as:

358 *“they [end-users] also identified with her [the instructor] in a way because she also was*  
359 *coming from trauma.”* (P06; PLWH, CBO stakeholder).

360 Finally, a participant involved in the development of an online exercise platform for individuals living  
361 with chronic conditions discussed working with clinicians, charities and academics to increase CBE  
362 program awareness. They mentioned how forming a “multidisciplinary team” includes:

363 *“[a] technical team or user experience [personnel], data analytics... tech support, customer*  
364 *service, studio managers, clinical leads, instructors, marketing, developers, user experience*  
365 *design and partners.”* (P04; RP, FP, eL stakeholder)

366

### 367 *Program Content & Design*

368 Participants highlighted the importance of supporting the needs of PLWH in online CBE, including  
369 offering tailored exercise classes and educational sessions focused on enhancing multidimensional  
370 health and self-management among PLWH. Commonly reported components to include in an online  
371 CBE program were exercise classes tailored to the physical ability of end-users:

372 *“not just offering one type of intervention exercise program, recognizing that people have*  
373 *different needs,”* P04 (RP, FP, eL stakeholder).

374 Educational sessions for end-users on HIV and health management also were described as desirable by  
375 participants with experience delivering online CBE. Topics covered through these sessions included  
376 education on the “*benefits of exercise,*” nutrition, “*like what kind of nutrition can help you maintain an*  
377 *exercise routine,*” mental health considerations such as “*[lectures on] sleep hygiene... meditation... and stress management*” as well as what to be aware of when taking certain medications.

379



380 Community Dimension

381 *Building Community*

382 Building a sense of community when creating an online CBE program was discussed as an important  
383 factor in online CBE by all participants; highlighting the value of end-users connecting to one another  
384 through shared experiences, peer support, and social opportunities. One participant mentioned online  
385 exercise could allow for:

386 *“room for them to share experiences or just how they're feeling in general, their aches and*  
387 *pains that they can each relate with...it might be like a factor for them to be motivated because*  
388 *they find that people here understand me and what I'm going through.”* (P11; RP, eL  
389 stakeholder).

390 Another participant, with experience as an end-user of online CBE, highlighted feelings of  
391 empowerment nurtured by a program with a group of people with similar experiences:

392 *We can try to chat privately if it's on, Zoom and say hey, 'here's my phone number let's talk.'*  
393 *[...] you could actually gain friends and I have found that, when people living with HIV come*  
394 *together, there is power and support.* (P07; PLWH, eL, CBO stakeholder)

395 Forming these connections can facilitate peer support, which can increase physical activity and exercise  
396 program adherence as on participant stated:

397 *“they'll [end-users] form relationships, they'll continue with long term engagement in physical*  
398 *activity, and supporting and encouraging one another.”* (P04; RP, FP, eL stakeholder)

399 However, some participants reported that community building online differs from in-person CBE:

400            *“some of that kind of informal chatter and conversation, those opportunities are lost, so we may*  
401            *have to rethink, how do we still get to the best parts of in-person interactions and translate it*  
402            *into a virtual format.”* (P01; RP, eL stakeholder)

403    To address this, participants suggested including designated time before and/or after an online CBE  
404    class to socialize, *“whether that's through a group chat with everyone participating together or you*  
405    *know, just being online for another 15 minutes after the exercises to check on each other.”* (P11; RP,  
406    eL stakeholder)

407

## 408    **DISCUSSION**

409    To our knowledge, this is the first qualitative study to explore considerations for developing and  
410    implementing an online CBE program with PLWH. Results suggest there is a need for, and utility of,  
411    online CBE with PLWH from both organizational and end-user stakeholder perspectives. Participants  
412    revealed six interconnected factors to consider, spanning individual, structural and community  
413    dimensions, when developing and implementing such a program.

### 414    **Need for and utility of online community-based exercise with people living with HIV**

415    Participants highlighted the need for and utility of online CBE to increase access to health services by  
416    enhancing continuity of care and improving multidimensional health outcomes for PLWH. In previous  
417    studies, barriers to CBE and other forms of exercise for PLWH included travelling through cold  
418    weather and costs of a gym membership.<sup>26 27 29</sup> Similarly, individuals living with COPD expressed long  
419    travel times as limiting their participation in exercise,<sup>53</sup> and those living in rural communities described  
420    difficulties accessing health services.<sup>54</sup> Participants in this study articulated how an online CBE  
421    intervention may be a valuable tool for adults living with HIV or other chronic conditions, especially if  
422    end-users do not need to travel to access an exercise program.

423 Notably, participants emphasized how online CBE may be uniquely poised to fill health care  
424 delivery gaps for PLWH. Pilot studies investigating existing mobile health technologies for PLWH  
425 focused on physical health, but have limited mention of supporting other health dimensions.<sup>41</sup>  
426 Participants in this study described online CBE as a means of improving health in the physical, mental,  
427 and social dimensions; with social health strongly linked to the factor of building a sense of  
428 community. This is important, as creating community, leadership, and resiliency are strengths within  
429 the HIV community.<sup>10 11</sup> Thus, creation of online CBE should include engagement of PLWH at all  
430 stages of development and implementation.

#### 431 **Navigating person-specific considerations with adults living with HIV**

432 Persons living with HIV can experience high levels of perceived, anticipated and enacted stigma,<sup>55 56</sup>  
433 and a barrier to in-person exercise, which may increase social isolation for PLWH.<sup>18 27</sup> As group-based  
434 forms of CBE can provide opportunities for social interaction, PLWH participating in an HIV-specific  
435 online CBE intervention may feel more comfortable participating with other PLWH who possess a  
436 mutual and shared understanding and shared experiences living with HIV.<sup>57</sup> Hence, an online CBE  
437 program designed exclusively for PLWH may be preferred by some PLWH. However, a PLWH-  
438 specific online CBE program may pose additional confidentiality and privacy challenges, as users of  
439 online exercise programs often display their name and photo or video during exercise sessions. Thus,  
440 participation in an HIV-specific program may lead to unintentional disclosure of HIV status. HIV  
441 disclosure could be mitigated through a generalized online CBE for individuals living with chronic  
442 conditions, including PLWH. Ultimately, benefits exist with both HIV-specific and generalized chronic  
443 (episodic) CBE programming depending on the individual.

444

445

## 446 **Addressing digital literacy**

447 Participants in this study shared concerns regarding the usability of online CBE programs for those  
448 with limited computer skills. This was supported by rehabilitation professionals who suggested there  
449 may be unequal access to remote health services based on end-users' level of digital literacy.<sup>53 54</sup>  
450 However, the prospect of learning new technologies and information technology (IT) skills has been  
451 met with resistance from rehabilitation professionals who stated that helping end-users with  
452 technological troubleshooting was not within their scope of practice.<sup>53</sup> Within the context of the  
453 COVID-19 pandemic, this mindset may have shifted as the increased need for virtual care may  
454 encourage professionals to adopt tele-rehabilitation and increasing willingness to embrace the use of  
455 IT.<sup>58</sup> Nonetheless, a multidisciplinary team (including those with knowledge of IT) are needed for  
456 successful implementation of online CBE.

## 457 **Forming social connections in online CBE settings**

458 Participants in this study indicated that if PLWH participate in a class with others who share similar  
459 experiences, it can encourage the formation of social connections. This is important as social isolation,  
460 particularly during the COVID-19 can be a contributor to poorer health outcomes and difficulty  
461 engaging in exercise for PLWH.<sup>59 60</sup> Participation in an online CBE intervention can optimize  
462 community building and help to decrease social isolation and increase engagement in exercise among  
463 people with other chronic conditions, thus potentially possessing transferability with PLWH.<sup>61 62</sup>  
464 However, challenges in forming social connections online may persist as some aspects of socialization  
465 may not occur naturally in online settings, such as the informal chatter and conversations mentioned by  
466 participants. To help facilitate such interactions, previous studies examining online exercise programs  
467 demonstrated the necessity of providing opportunities for “icebreaking” pre- and post- class.<sup>53</sup> Thus,  
468 we recommend including designated social time for end-users to interact with one another as well as  
469 with instructors during online CBE programming.

## 470 **COVID-19 pandemic context**

471 This study was designed prior to the COVID-19 pandemic as a way to address barriers to exercising in  
472 traditional gym environments among PLWH. Due to the timeline of the pandemic, we collected data at  
473 a time when participants were having to shift from in-person to online services out of necessity and  
474 fitness facility closures. As a result, the need for online CBE programs and how they may be used,  
475 were often interwoven with personal and professional experiences from the COVID-19 pandemic;  
476 including conversations around how online services and programs may be needed, have benefit for,  
477 and/or be used, following the pandemic. With the closure of fitness facilities during the COVID-19  
478 pandemic and the potential reluctance for PLWH to return to gym/fitness facilities in-person upon  
479 reopening, these results may also have additional relevance and meaning to PLWH as well as those  
480 living with other chronic or episodic conditions.

## 481 **Implications for future research**

482 Our results contribute to the understanding of considerations for developing and implementing an  
483 online CBE intervention with adults living with HIV, from the perspectives of five stakeholder groups.  
484 Using the six factors for consideration in this study, future work may involve the development of an  
485 online CBE intervention in collaboration with the HIV and rehabilitation communities. Future research  
486 should examine the strengths, challenges and impact of implementation of online CBE in ‘real world’  
487 community settings from the perspectives of PLWH and individuals involved in administering the  
488 CBE. Evaluation of the impact of online CBE on physical, mental, and social health-related outcomes  
489 following an online CBE intervention, as well as research into the cost-effectiveness and sustainability  
490 of an online CBE intervention is needed.

491

492

## 493 **Strengths and Limitations**

494 Our study included perspectives from participants with lived experience, expertise in eLearning and  
495 tele-health/tele-rehabilitation in the context of chronic disease management, allowing for a diversity of  
496 insights into online CBE and chronic and episodic conditions such as HIV. Our use of the MAST  
497 framework enabled us to comprehensively explore the diverse aspects of telemedicine services using  
498 this conceptual foundation of information, communication and technology.<sup>48</sup> We did not achieve our  
499 targeted sample size of 12 participants, nor did we reach saturation. Nonetheless, we were able to  
500 capture a rich description of experiences and diversity of perspectives enabling us to achieve our study  
501 objectives. Conducting interviews online using Zoom implied participants had access to technology  
502 and the internet. As a result, perspectives may not be transferable to those without access to technology  
503 and who may have articulated financial, technical and digital barriers for online CBE. Further, most  
504 participants were living in Canada, hence, it is unclear how results may be transferable to other  
505 geographical contexts.

506

## 507 **CONCLUSIONS**

508 We described the need and utility for online CBE among PLWH and six factors spanning individual,  
509 structural and community dimensions for considerations when developing and implementing online  
510 CBE with PLWH. Results provide a foundation for the future development and implementation of  
511 online CBE programs for PLWH and may help to inform online CBE development for individuals  
512 living with other chronic and episodic conditions.

513 **ACKNOWLEDGEMENTS**

514 This research was completed in partial fulfillment of the requirements for a Masters in Physical  
515 Therapy degree at the University of Toronto. The authors thank the participants for their time and  
516 sharing their insights. We also thank Francisco Ibáñez-Carrasco and George Da Silva, for taking part in  
517 pilot interviews and providing feedback on the interview guide.

518 **CONTRIBUTORS**

519 KKO, SCC and FIC designed the study and provided guidance throughout the research process. KKO,  
520 SCC and FIC possess expertise in qualitative methodology and HIV and exercise research. KKO, SCC  
521 and FIC supervised BL, IS, SM, JK and LYW (MScPT students) who developed the protocol, collected  
522 and analyzed data and drafted the manuscript in partial fulfillment of the requirements for a MScPT  
523 degree at the University of Toronto. BL, IS, SM, JK and LYW developed skills in qualitative  
524 methodology and study design; understanding steps of recruitment, data collection and analysis;  
525 completing a literature review; developing the research protocol, interview guide, demographic  
526 questionnaire, coding scheme and considering ethical issues associated with this research. All steps  
527 were closely reviewed and guided by KKO, SCC and FIC. All authors read and approved the final  
528 manuscript.

529 **FUNDING**

530 This research was supported by the Connaught Community Partner Research Program (University of  
531 Toronto) and the Ontario HIV Treatment Network (OHTN) Endgame Breaking New Ground Program  
532 (EFP-1121-BNG). KKO is supported by a Canada Research Chair in Episodic Disability and  
533 Rehabilitation from the Canada Research Chairs Program.

534 **COMPETING INTERESTS**

535 None declared.

536 **ETHICS APPROVAL**

537 This study received approval from the University of Toronto Research Ethics Board (Protocol #39603).

538

539 **DATA SHARING STATEMENT**

540 Relevant data to this study are included in the article. No additional data is available in accordance with  
541 our protocol approved by the University of Toronto Research Ethics Board.

542

543 **FIGURE CAPTIONS**

544 **Figure 1.** Six factors to consider in developing and implementing an online CBE intervention with  
545 adults living with HIV.

546 **SUPPLEMENTAL FILES**

547 **Supplemental file 1:** Semi-structured interview guide.

548 **Supplemental file 2:** PowerPoint slideshow with interview guide questions shared with study  
549 participants during Zoom interviews.

550 **Supplemental file 3:** Original Protocol – Research Ethics Board Approval

551

552

553

554

555

556

557

558

559



560 **REFERENCES**

561

- 562 1. Antiretroviral Therapy Cohort Collaboration. Survival of HIV-positive patients starting antiretroviral  
563 therapy between 1996 and 2013: a collaborative analysis of cohort studies. *The lancet HIV*  
564 2017;4(8):e349-e56. doi: 10.1016/S2352-3018(17)30066-8
- 565 2. Montessori V, Press N, Harris M, et al. Adverse effects of antiretroviral therapy for HIV infection.  
566 *CMAJ : Canadian Medical Association journal = journal de l'Association medicale canadienne*  
567 2004;170(2):229-38. [published Online First: 2004/01/22]
- 568 3. Kendall CE, Wong J, Taljaard M, et al. A cross-sectional, population-based study measuring  
569 comorbidity among people living with HIV in Ontario. *BMC public health* 2014;14(1):161. doi:  
570 10.1186/1471-2458-14-161 [published Online First: 2014/02/15]
- 571 4. Allavena C, Hanf M, Rey D, et al. Antiretroviral exposure and comorbidities in an aging HIV-  
572 infected population: The challenge of geriatric patients. *PloS one* 2018;13(9):e0203895. doi:  
573 10.1371/journal.pone.0203895 [published Online First: 2018/09/22]
- 574 5. Rodriguez-Penney AT, Iudicello JE, Riggs PK, et al. Co-morbidities in persons infected with HIV:  
575 increased burden with older age and negative effects on health-related quality of life. *AIDS*  
576 *Patient Care STDS* 2013;27(1):5-16. doi: 10.1089/apc.2012.0329 [published Online First:  
577 2013/01/12]
- 578 6. O'Brien KK, Bayoumi AM, Strike C, et al. Exploring disability from the perspective of adults living  
579 with HIV/AIDS: development of a conceptual framework. *Health Qual Life Outcomes*  
580 2008;6:76. doi: 1477-7525-6-76 [pii] 10.1186/1477-7525-6-76 [published Online First:  
581 2008/10/07]
- 582 7. Solomon P, O'Brien K, Wilkins S, et al. Aging with HIV: a model of disability. *Journal of the*  
583 *International Association of Providers of AIDS Care* 2014;13(6):519-25. doi:  
584 10.1177/2325957414547431 [published Online First: 2014/08/26]
- 585 8. Gottert A, Friedland B, Geibel S, et al. The People Living with HIV (PLHIV) Resilience Scale:  
586 Development and Validation in Three Countries in the Context of the PLHIV Stigma Index.  
587 *AIDS Behav* 2019;23(Suppl 2):172-82. doi: 10.1007/s10461-019-02594-6 [published Online  
588 First: 2019/07/28]
- 589 9. Trapence G, Collins C, Avrett S, et al. From personal survival to public health: community  
590 leadership by men who have sex with men in the response to HIV. *Lancet* 2012;380(9839):400-  
591 10. doi: 10.1016/S0140-6736(12)60834-4 [published Online First: 2012/07/24]
- 592 10. De Santis JP, Florom-Smith A, Vermeesch A, et al. Motivation, management, and mastery: a theory  
593 of resilience in the context of HIV infection. *J Am Psychiatr Nurses Assoc* 2013;19(1):36-46.  
594 doi: 10.1177/1078390312474096
- 595 11. Dale SK, Grimes T, Miller L, et al. "In our stories": The perspectives of women living with HIV on  
596 an evidence-based group intervention. *J Health Psychol* 2017;22(8):1035-45. doi:  
597 10.1177/1359105315622558 [published Online First: 2016/01/17]
- 598 12. O'Brien KK, Tynan AM, Nixon SA, et al. Effectiveness of Progressive Resistive Exercise in the  
599 Context of HIV: Systematic Review and Meta-Analysis Using the Cochrane Collaboration  
600 Protocol. *BMC infectious diseases* 2017;Accepted March 24, 2017

- 601 13. O'Brien KK, Tynan AM, Nixon SA, et al. Effectiveness of aerobic exercise for adults living with  
602 HIV: systematic review and meta-analysis using the Cochrane Collaboration protocol. *BMC*  
603 *infectious diseases* 2016;16(1):182. doi: 10.1186/s12879-016-1478-2
- 604 14. Nosrat S, Whitworth JW, Ciccolo JT. Exercise and mental health of people living with HIV: A  
605 systematic review. *Chronic illness* 2017;13(4):299-319. doi: 10.1177/1742395317694224  
606 [published Online First: 2017/11/10]
- 607 15. Lopez J, Richardson E, Tiozzo E, et al. The effect of exercise training on disease progression,  
608 fitness, quality of life, and mental health in people living with HIV on antiretroviral therapy: a  
609 systematic review. *J Clin Transl Res* 2015;1(3):129-39. [published Online First: 2015/11/30]
- 610 16. Vancampfort D, Mugisha J, De Hert M, et al. Global physical activity levels among people living  
611 with HIV: a systematic review and meta-analysis. *Disabil Rehabil* 2018;40(4):388-97. doi:  
612 10.1080/09638288.2016.1260645 [published Online First: 2016/12/09]
- 613 17. Vancampfort D, Mugisha J, Richards J, et al. Physical activity correlates in people living with  
614 HIV/AIDS: a systematic review of 45 studies. *Disabil Rehabil* 2018;40(14):1618-29. doi:  
615 10.1080/09638288.2017.1306587 [published Online First: 2017/03/23]
- 616 18. Quigley A, Baxter L, Keeler L, et al. Using the Theoretical Domains Framework to identify barriers  
617 and facilitators to exercise among older adults living with HIV. *AIDS Care* 2019;31(2):163-68.  
618 doi: 10.1080/09540121.2018.1499860 [published Online First: 2018/07/20]
- 619 19. Rehm KE, Konkle-Parker D. Physical activity levels and perceived benefits and barriers to physical  
620 activity in HIV-infected women living in the deep south of the United States. *AIDS Care*  
621 2016;28(9):1205-10. doi: 10.1080/09540121.2016.1164802 [published Online First:  
622 2016/03/30]
- 623 20. Stuart M, Benvenuti F, Macko R, et al. Community-based adaptive physical activity program for  
624 chronic stroke: feasibility, safety, and efficacy of the Empoli model. *Neurorehabilitation and*  
625 *neural repair* 2009;23(7):726-34. doi: 10.1177/1545968309332734 [published Online First:  
626 2009/03/26]
- 627 21. Salbach NM, Howe JA, Brunton K, et al. Partnering to Increase Access to Community Exercise  
628 Programs for People With Stroke, Acquired Brain Injury and Multiple Sclerosis. *Journal of*  
629 *physical activity & health* 2013 [published Online First: 2013/05/17]
- 630 22. Fairbairn M, Wicks E, Ait-Ouali S, et al. Facilitators of and Barriers to Providing Access to  
631 Community-Based Exercise Programmes for Adults with Post-Stroke Aphasia from the  
632 Perspective of Programme Representatives. *Physiother Can* 2018;70(3):280-88. doi:  
633 10.3138/ptc.2016-103 [published Online First: 2018/10/03]
- 634 23. Dnes N, Coley B, Frisby K, et al. "A little bit of a guidance and a little bit of group support": a  
635 qualitative study of preferences, barriers, and facilitators to participating in community-based  
636 exercise opportunities among adults living with chronic pain. *Disabil Rehabil*  
637 2021;43(23):3347-56. doi: 10.1080/09638288.2020.1742801 [published Online First:  
638 2020/04/01]
- 639 24. Effing T, Zielhuis G, Kerstjens H, et al. Community based physiotherapeutic exercise in COPD  
640 self-management: a randomised controlled trial. *Respiratory medicine* 2011;105(3):418-26. doi:  
641 10.1016/j.rmed.2010.09.017 [published Online First: 2010/10/19]

- 642 25. Zwerink M, Effing T, Kerstjens HA, et al. Cost-Effectiveness of a Community-Based Exercise  
643 Programme in COPD Self-Management. *COPD* 2016;13(2):214-23. doi:  
644 10.3109/15412555.2015.1074171 [published Online First: 2015/12/02]
- 645 26. Montgomery CA, Henning KJ, Kantarzi SR, et al. Experiences participating in a community-  
646 based exercise programme from the perspective of people living with HIV: a qualitative study.  
647 *BMJ Open* 2017;7(4):e015861. doi: 10.1136/bmjopen-2017-015861 [published Online First:  
648 2017/04/06]
- 649 27. Li A, McCabe T, Silverstein E, et al. Community-Based Exercise in the Context of HIV. *Journal of*  
650 *the International Association of Providers of AIDS Care* 2017:2325957416686836. doi:  
651 10.1177/2325957416686836
- 652 28. Cutrono SE, Lewis JE, Perry A, et al. The Effect of a Community-Based Exercise Program on  
653 Inflammation, Metabolic Risk, and Fitness Levels Among Persons Living with HIV/AIDS.  
654 *AIDS Behav* 2016;20(5):1123-31. doi: 10.1007/s10461-015-1245-1 [published Online First:  
655 2015/11/27]
- 656 29. Solomon P, Carusone SC, Davis AM, et al. Experiences of People Living With HIV in Community  
657 Based Exercise: A Qualitative Longitudinal Study. *Journal of the International Association of*  
658 *Providers of AIDS Care* 2021;20:2325958221995344. doi: 10.1177/2325958221995344  
659 [published Online First: 2021/02/23]
- 660 30. Ortiz A, Ramirez-Marrero, F., Rosario, M., Venegas-Rios, HL. Long-term participation in a  
661 community-based fitness program for hispanic adults living with HIV influences health-related  
662 outcomes fitness in hispanic adults living with HIV. *Journal of Physical Therapy and Health*  
663 *Promotion* 2014;2(1):1-7.
- 664 31. O'Brien KK, Davis AM, Chan Carusone S, et al. Examining the impact of a community-based  
665 exercise intervention on cardiorespiratory fitness, cardiovascular health, strength, flexibility and  
666 physical activity among adults living with HIV: A three-phased intervention study. *PloS one*  
667 2021;16(9):e0257639. doi: 10.1371/journal.pone.0257639 [published Online First: 2021/09/25]
- 668 32. Public Health Ontario. Lockdown Duration and Re-Opening including Considerations for COVID-  
669 19 variants of concern. 2021 January 29, 2021. [https://www.publichealthontario.ca/-  
670 /media/documents/ncov/phm/2021/02/covid-19-environmental-scan-lockdowns-reopening-  
671 considerations-voc.pdf?la=en](https://www.publichealthontario.ca/-/media/documents/ncov/phm/2021/02/covid-19-environmental-scan-lockdowns-reopening-considerations-voc.pdf?la=en).
- 672 33. Pan American Health Organization. Framework for the Implementation of a Telemedicine Service.  
673 2016.
- 674 34. Hilty DM, Chan S, Torous J, et al. Mobile Health, Smartphone/Device, and Apps for Psychiatry  
675 and Medicine: Competencies, Training, and Faculty Development Issues. *Psychiatr Clin North*  
676 *Am* 2019;42(3):513-34. doi: 10.1016/j.psc.2019.05.007 [published Online First: 2019/07/31]
- 677 35. Wood BR, Lan KF, Tao Y, et al. Visit Trends and Factors Associated With Telemedicine Uptake  
678 Among Persons With HIV During the COVID-19 Pandemic. *Open forum infectious diseases*  
679 2021;8(11):ofab480. doi: 10.1093/ofid/ofab480 [published Online First: 2021/11/11]
- 680 36. Budak JZ, Scott JD, Dhanireddy S, et al. The Impact of COVID-19 on HIV Care Provided via  
681 Telemedicine-Past, Present, and Future. *Curr HIV/AIDS Rep* 2021;18(2):98-104. doi:  
682 10.1007/s11904-021-00543-4 [published Online First: 2021/02/23]

- 683 37. Piraux E, Reychler G, Forget P, et al. Feasibility and Preliminary Effects of a Telerehabilitation  
684 Program for People Living With HIV: A Pilot Randomized Study. *J Assoc Nurses AIDS Care*  
685 2019;30(2):176-85. doi: 10.1097/JNC.000000000000005 [published Online First: 2019/03/02]
- 686 38. Loeckx M, Rabinovich RA, Demeyer H, et al. Smartphone-Based Physical Activity Telecoaching  
687 in Chronic Obstructive Pulmonary Disease: Mixed-Methods Study on Patient Experiences and  
688 Lessons for Implementation. *JMIR mHealth and uHealth* 2018;6(12):e200. doi:  
689 10.2196/mhealth.9774 [published Online First: 2018/12/24]
- 690 39. Ramage ER, Fini NA, Lynch EA, et al. Supervised exercise delivered via telehealth in real time to  
691 manage chronic conditions in adults: a protocol for a scoping review to inform future research  
692 in stroke survivors. *BMJ Open* 2019;9(3):e027416. doi: 10.1136/bmjopen-2018-027416  
693 [published Online First: 2019/03/23]
- 694 40. Lai B, Bond K, Kim Y, et al. Exploring the uptake and implementation of tele-monitored home-  
695 exercise programmes in adults with Parkinson's disease: A mixed-methods pilot study. *Journal*  
696 *of telemedicine and telecare* 2020;26(1-2):53-63. doi: 10.1177/1357633X18794315 [published  
697 Online First: 2018/08/24]
- 698 41. Schnall R, Cho H, Mangone A, et al. Mobile Health Technology for Improving Symptom  
699 Management in Low Income Persons Living with HIV. *AIDS Behav* 2018;22(10):3373-83. doi:  
700 10.1007/s10461-017-2014-0 [published Online First: 2018/01/05]
- 701 42. Simoni JM, Ronen K, Aunon FM. Health Behavior Theory to Enhance eHealth Intervention  
702 Research in HIV: Rationale and Review. *Curr HIV/AIDS Rep* 2018;15(6):423-30. doi:  
703 10.1007/s11904-018-0418-8 [published Online First: 2018/12/05]
- 704 43. Dandachi D, Dang BN, Lucari B, et al. Exploring the Attitude of Patients with HIV About Using  
705 Telehealth for HIV Care. *AIDS Patient Care STDS* 2020;34(4):166-72. doi:  
706 10.1089/apc.2019.0261 [published Online First: 2020/04/24]
- 707 44. Sandelowski M. What's in a name? Qualitative description revisited. *Res Nurs Health*  
708 2010;33(1):77-84. doi: 10.1002/nur.20362 [published Online First: 2009/12/17]
- 709 45. O'Brien KK, Ibanez-Carrasco F, Solomon P, et al. Research priorities for rehabilitation and aging  
710 with HIV: a framework from the Canada-International HIV and Rehabilitation Research  
711 Collaborative (CIHRRC). *AIDS Res Ther* 2020;17(1):21. doi: 10.1186/s12981-020-00280-5  
712 [published Online First: 2020/05/21]
- 713 46. Zoom Health Care Video Communications [program], 2020.
- 714 47. Archibald MM, Ambagtsheer RC, Casey MG, et al. Using Zoom videoconferencing for qualitative  
715 data collection: perceptions and experiences of researchers and participants. *International*  
716 *Journal of Qualitative Research* 2019;18:1-8.
- 717 48. Kidholm K, Ekeland AG, Jensen LK, et al. A model for assessment of telemedicine applications:  
718 mast. *Int J Technol Assess Health Care* 2012;28(1):44-51. doi: 10.1017/S0266462311000638  
719 [published Online First: 2012/05/24]
- 720 49. Braun V, Clarke V. Using thematic analysis in psychology. *Qualitative Reserach in Psychology*  
721 2006;3(2):77-101.

- 722 50. Flicker S, Nixon SA. The DEPICT model for participatory qualitative health promotion research  
723 analysis piloted in Canada, Zambia and South Africa. *Health promotion international*  
724 2015;30(3):616-24. doi: 10.1093/heapro/dat093 [published Online First: 2014/01/15]
- 725 51. NVivo qualitative data analysis software. Version 12. [program], 2018.
- 726 52. Baltar F, Brunet, I. Social research 2.0: virtual snowball sampling method using Facebook. .  
727 *Internet Research* 2012;22(1):57-74.
- 728 53. Damhus CS, Emme C, Hansen H. Barriers and enablers of COPD telerehabilitation - a frontline  
729 staff perspective. *Int J Chron Obstruct Pulmon Dis* 2018;13:2473-82. doi:  
730 10.2147/COPD.S167501 [published Online First: 2018/08/30]
- 731 54. Jang-Jaccard J, Nepal S, Alem L, et al. Barriers for delivering telehealth in rural australia: a review  
732 based on Australian trials and studies. *Telemedicine journal and e-health : the official journal*  
733 *of the American Telemedicine Association* 2014;20(5):496-504. doi: 10.1089/tmj.2013.0189  
734 [published Online First: 2014/05/08]
- 735 55. Reinius M, Wiklander M, Wettergren L, et al. The Relationship Between Stigma and Health-  
736 Related Quality of Life in People Living with HIV Who Have Full Access to Antiretroviral  
737 Treatment: An Assessment of Earnshaw and Chaudoir's HIV Stigma Framework Using  
738 Empirical Data. *AIDS Behav* 2018;22(12):3795-806. doi: 10.1007/s10461-018-2041-5  
739 [published Online First: 2018/02/09]
- 740 56. Emler CA. Stigma in an Aging Context. *Interdiscip Top Gerontol Geriatr* 2017;42:144-58. doi:  
741 10.1159/000448560
- 742 57. Reeves PM. How individuals coping with HIV/AIDS use the Internet. *Health education research*  
743 2001;16(6):709-19. doi: 10.1093/her/16.6.709 [published Online First: 2002/01/10]
- 744 58. Scherrenberg M, Wilhelm M, Hansen D, et al. The future is now: a call for action for cardiac  
745 telerehabilitation in the COVID-19 pandemic from the secondary prevention and rehabilitation  
746 section of the European Association of Preventive Cardiology. *European journal of preventive*  
747 *cardiology* 2020 doi: 10.1177/2047487320939671 [published Online First: 2021/02/22]
- 748 59. Shiau S, Krause KD, Valera P, et al. The Burden of COVID-19 in People Living with HIV: A  
749 Syndemic Perspective. *AIDS Behav* 2020 doi: 10.1007/s10461-020-02871-9 [published Online  
750 First: 2020/04/19]
- 751 60. Gatechompol S, Avihingsanon A, Putcharoen O, et al. COVID-19 and HIV infection co-pandemics  
752 and their impact: a review of the literature. *AIDS Res Ther* 2021;18(1):28. doi: 10.1186/s12981-  
753 021-00335-1 [published Online First: 2021/05/07]
- 754 61. Fraser SN, Spink KS. Examining the role of social support and group cohesion in exercise  
755 compliance. *J Behav Med* 2002;25(3):233-49. doi: 10.1023/a:1015328627304 [published  
756 Online First: 2002/06/12]
- 757 62. Ologhobo T TB, Zurlini C, McGrath B, Roberts L, Briones V, Sanchez-Villagomez P, Wiesel R,  
758 Goldsmith S, Robbins L. Improving Health Outcomes and Social Connectedness Through  
759 Virtual Exercise Programs in Community Members with Musculoskeletal Conditions. *Arthritis*  
760 *Rheumatol* 2021;73 [published Online First: November 14, 2021]

761

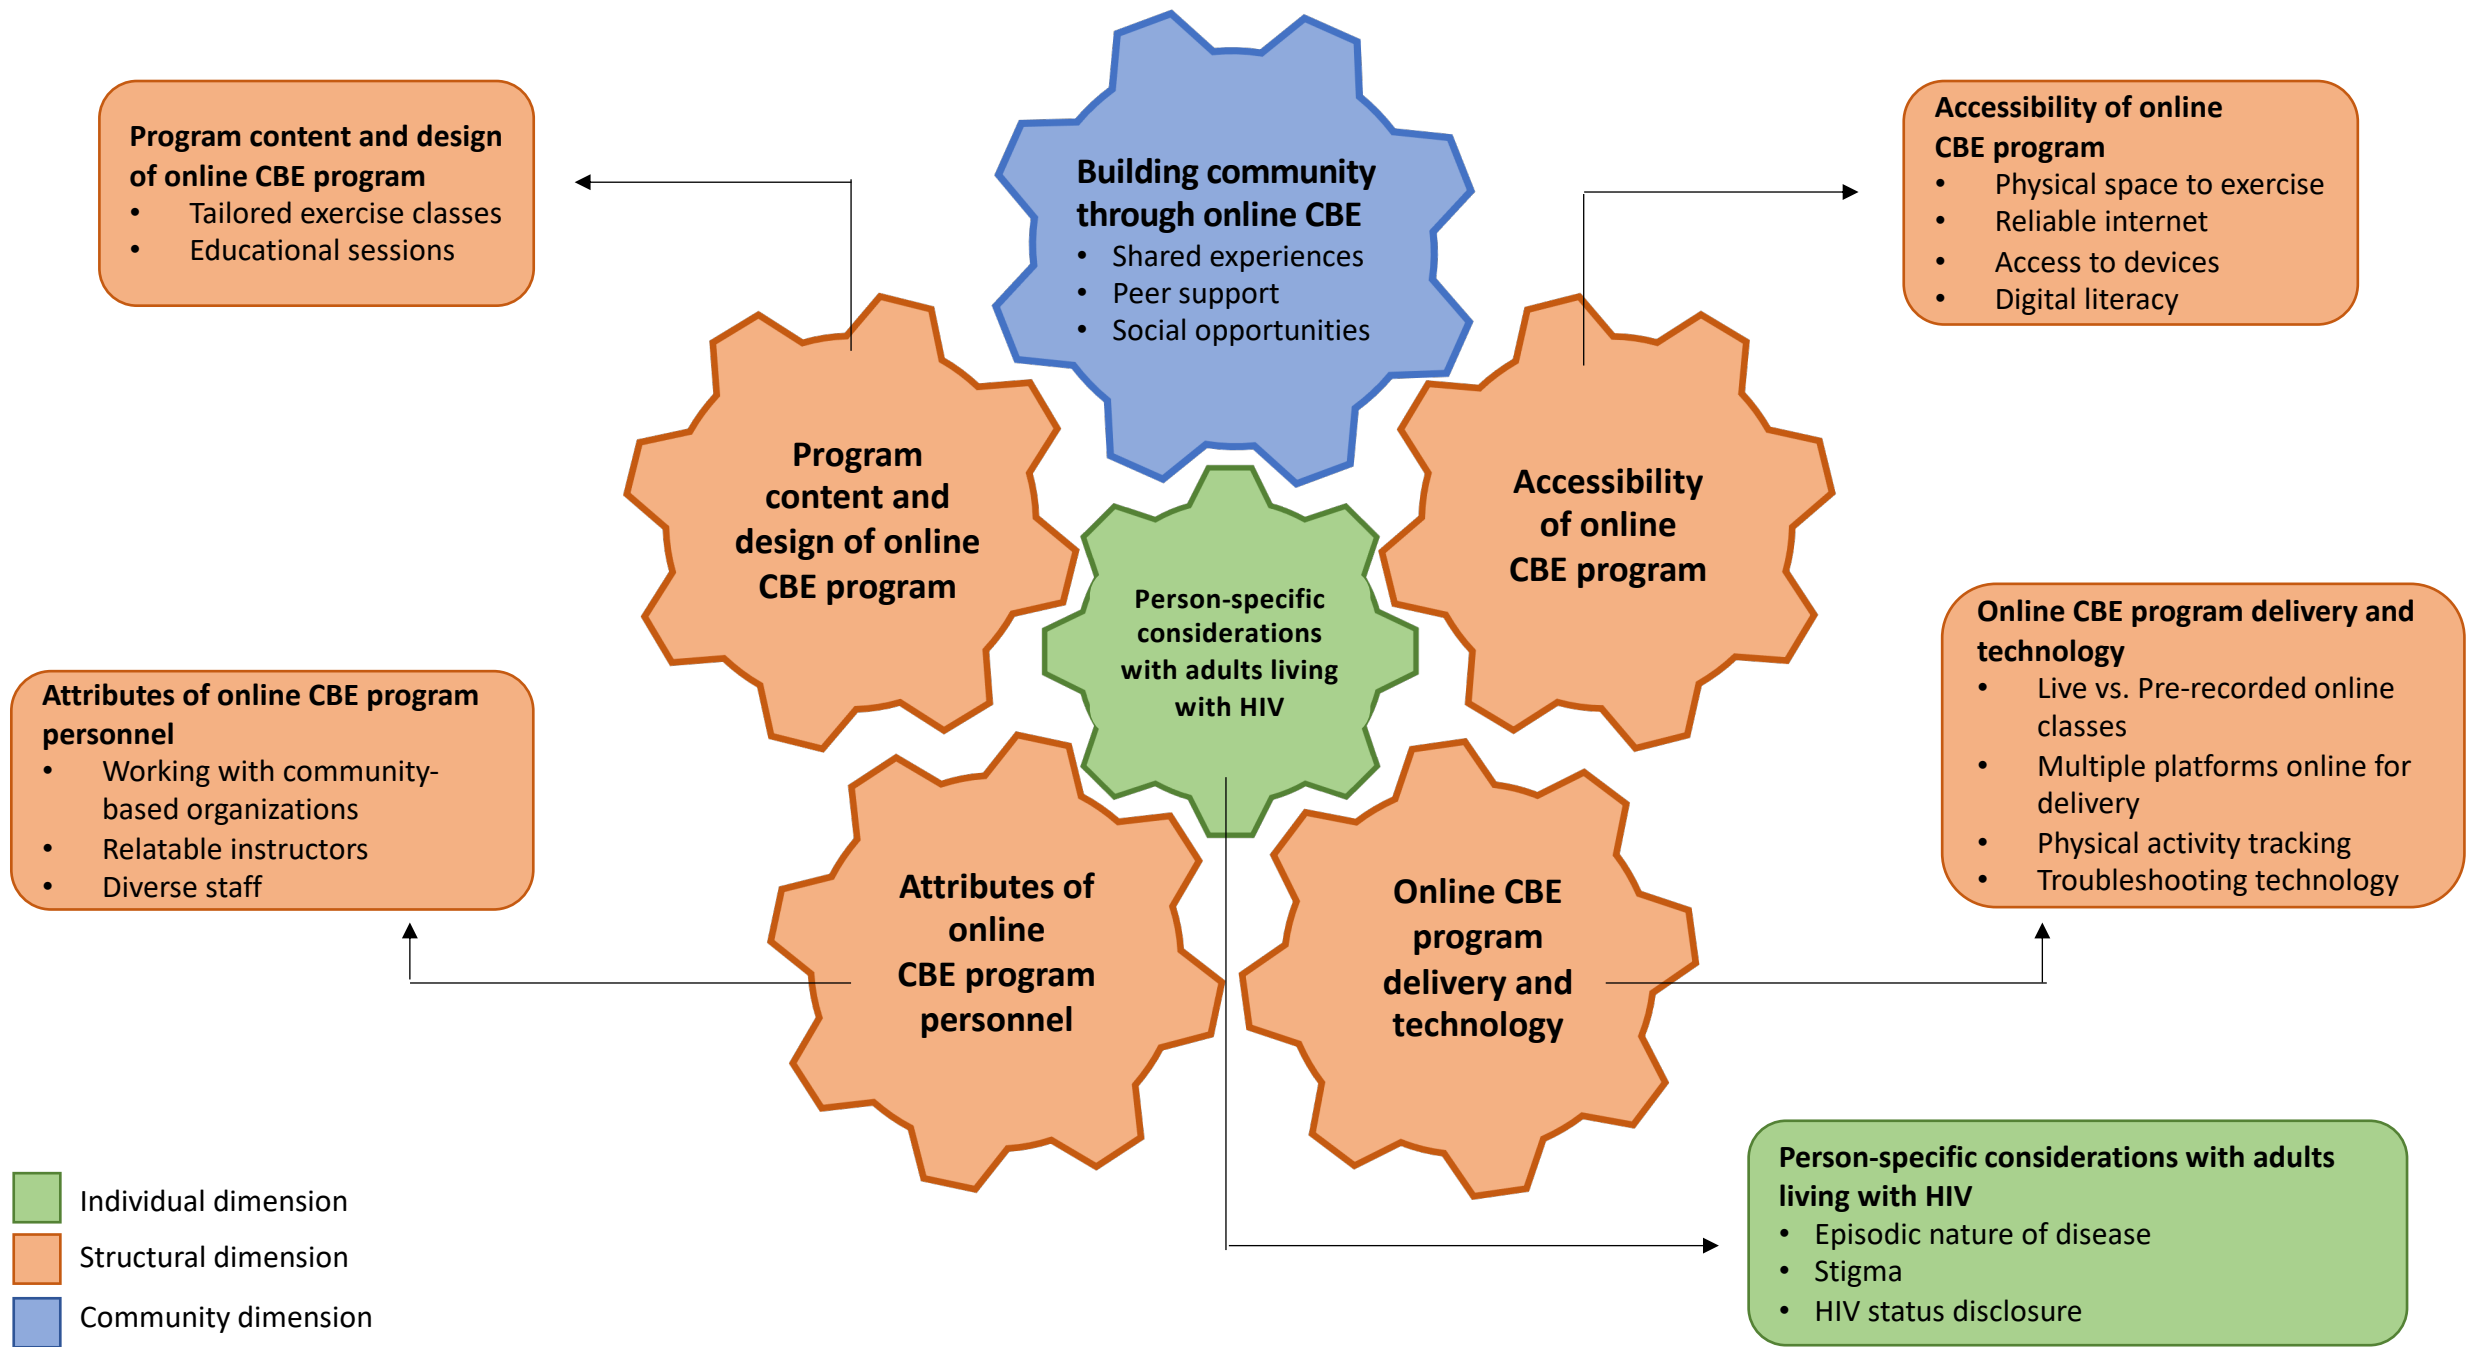

Source: https://medrxiv.org/content/10.1101/2021.11.14.21266319v1.full.pdf
